# Supplementary material for: Basic Medical Training for Refugees via Collaborative Blended Learning: Quasi-Experimental Design
Source: PubMed Central journal article supplement (PMC8074855; doi:10.2196/22345), 2021-03-24
Supplement: jmir_v23i3e22345_app2.pdf [file jmir_v23i3e22345_app2.pdf]

**Multimedia Appendix 2.** Module 1 basic medical training program, quizzes results and duration.

| Unit [no.] | Organ system [name] | Khan academy® videos [title]                                                                                                                                                                                                                                                                                                                                                                                                                                                                                                                                                                                   | Anatomy and Physiology, book chapters [title]                                                                                                                                                                                                     | Quiz questions [n]                                | Mean quiz [%]                                     | Duration [week] |
|------------|---------------------|----------------------------------------------------------------------------------------------------------------------------------------------------------------------------------------------------------------------------------------------------------------------------------------------------------------------------------------------------------------------------------------------------------------------------------------------------------------------------------------------------------------------------------------------------------------------------------------------------------------|---------------------------------------------------------------------------------------------------------------------------------------------------------------------------------------------------------------------------------------------------|---------------------------------------------------|---------------------------------------------------|-----------------|
| 1          | Cardiovascular      | <ul style="list-style-type: none"> <li>- Meet the heart!</li> <li>- Flow through the heart</li> <li>- Two circulations in the body</li> <li>- Lub dub</li> <li>- Layers of the heart</li> <li>- Thermoregulation in the circulatory system</li> <li>- Arteries vs. veins - what's the difference?</li> <li>- Arteries, arterioles, venules, and veins</li> <li>- Circulatory system and the heart</li> </ul>                                                                                                                                                                                                   | <ul style="list-style-type: none"> <li>- The Cardiovascular System: The Heart</li> <li>- The Cardiovascular System: Blood Vessels and Circulation</li> </ul>                                                                                      | 12 <sup>a</sup> ,12 <sup>b</sup> ,11 <sup>c</sup> | 73 <sup>a</sup> ,61 <sup>b</sup> ,51 <sup>c</sup> | 2               |
| 2          | Respiratory         | <ul style="list-style-type: none"> <li>- Meet the lungs</li> <li>- People and plants</li> <li>- The bronchial tree</li> <li>- Inhaling and exhaling</li> <li>- How does lung volume change?</li> <li>- Thermoregulation in the lungs</li> <li>- The lungs and pulmonary system</li> </ul>                                                                                                                                                                                                                                                                                                                      | <ul style="list-style-type: none"> <li>- The Respiratory System</li> <li>- Fluid, Electrolyte, and Acid-Base Balance</li> </ul>                                                                                                                   | 13 <sup>a</sup> ,14 <sup>b</sup> ,12 <sup>c</sup> | 71 <sup>a</sup> ,59 <sup>b</sup> ,65 <sup>c</sup> | 1               |
| 3          | Urinary             | <ul style="list-style-type: none"> <li>- Meet the kidneys!</li> <li>- Kidney function and anatomy</li> <li>- Glomerular filtration in the nephron</li> <li>- Changing glomerular filtration rate</li> <li>- Countercurrent multiplication in the kidney</li> <li>- Urination</li> <li>- The kidney and nephron</li> <li>- Secondary active transport in the nephron</li> </ul>                                                                                                                                                                                                                                 | <ul style="list-style-type: none"> <li>- The Urinary System</li> </ul>                                                                                                                                                                            | 8 <sup>a</sup> ,8 <sup>b</sup> ,8 <sup>c</sup>    | 68 <sup>a</sup> ,67 <sup>b</sup> ,54 <sup>c</sup> | 1               |
| 4          | Digestive           | <ul style="list-style-type: none"> <li>- Meet the gastrointestinal tract!</li> <li>- Mouth</li> <li>- Teeth</li> <li>- Esophagus</li> <li>- Stomach</li> <li>- Small intestine 1: Structure</li> <li>- Small intestine 2: Digestion</li> <li>- Small intestine 3: Absorption</li> <li>- Liver</li> <li>- Hepatic lobule</li> <li>- Biliary tree</li> <li>- Exocrine pancreas</li> <li>- Endocrine pancreas</li> <li>- Colon, rectum, and anus</li> <li>- Control of the GI tract</li> </ul>                                                                                                                    | <ul style="list-style-type: none"> <li>- The Digestive System</li> <li>- Metabolism and Nutrition</li> </ul>                                                                                                                                      | 13 <sup>a</sup> ,13 <sup>b</sup> ,12 <sup>c</sup> | 61 <sup>a</sup> ,49 <sup>b</sup> ,36 <sup>c</sup> | 2               |
| 5          | Hematologic         | <ul style="list-style-type: none"> <li>- What's inside of blood?</li> <li>- Red blood cells</li> <li>- Blood types</li> <li>- Blood cell lineages</li> <li>- Life and times of RBCs and platelets</li> <li>- Hemoglobin</li> <li>- Hemoglobin moves O<sub>2</sub> and CO<sub>2</sub></li> <li>- Fetal hemoglobin and hematocrit</li> <li>- Oxygen content</li> <li>- How do we make blood clots?</li> <li>- Coagulation cascade</li> <li>- Bohr effect vs. Haldane effect</li> </ul>                                                                                                                           | <ul style="list-style-type: none"> <li>- The Cardiovascular System: Blood</li> </ul>                                                                                                                                                              | 10 <sup>a</sup> ,36 <sup>b+c</sup>                | 74 <sup>a</sup> ,44 <sup>b+c</sup>                | 1               |
| 6          | Immune              | <ul style="list-style-type: none"> <li>- Role of phagocytes in innate or nonspecific immunity</li> <li>- Types of immune responses: Innate and adaptive, humoral vs. cell-mediated</li> <li>- B lymphocytes (B cells)</li> <li>- Professional antigen presenting cells (APC) and MHC II complexes</li> <li>- Helper T cells</li> <li>- Cytotoxic T cells</li> <li>- Review of B cells, CD4+ T cells and CD8+ T cells</li> <li>- Clonal selection</li> <li>- Self vs. non-self immunity</li> <li>- How white blood cells move around</li> <li>- Inflammatory response</li> <li>- Blood cell lineages</li> </ul> | <ul style="list-style-type: none"> <li>- The Lymphatic and Immune System</li> </ul>                                                                                                                                                               | 10 <sup>a</sup> ,10 <sup>b+c</sup>                | 78 <sup>a</sup> ,48 <sup>b+c</sup>                | 1               |
| 7          | Nervous             | <ul style="list-style-type: none"> <li>- Introduction to neural cell types</li> <li>- Anatomy of a neuron</li> <li>- Overview of neuron structure</li> <li>- Overview of neuron function</li> <li>- Sodium-potassium pump</li> <li>- Correction to sodium-potassium pump video</li> <li>- Electrotonic and action potentials</li> <li>- Saltatory conduction in neurons</li> <li>- Synapse structure</li> <li>- Neuronal synapses (chemical)</li> </ul>                                                                                                                                                        | <ul style="list-style-type: none"> <li>- The Nervous System and Nervous Tissue</li> <li>- Anatomy of the Nervous System</li> <li>- The Somatic Nervous System</li> <li>- The Autonomic Nervous System</li> <li>- The Neurological Exam</li> </ul> | 16 <sup>a</sup> ,16 <sup>b</sup> ,16 <sup>c</sup> | 57 <sup>a</sup> ,47 <sup>b</sup> ,49 <sup>c</sup> | 3               |

|    |               |                                                                                                                                                                                                                                                                                                                                                                                                                                                                                                                                                                                                       |                                                                                                                                                                          |                                                   |                                                   |     |
|----|---------------|-------------------------------------------------------------------------------------------------------------------------------------------------------------------------------------------------------------------------------------------------------------------------------------------------------------------------------------------------------------------------------------------------------------------------------------------------------------------------------------------------------------------------------------------------------------------------------------------------------|--------------------------------------------------------------------------------------------------------------------------------------------------------------------------|---------------------------------------------------|---------------------------------------------------|-----|
|    |               | <ul style="list-style-type: none"> <li>- Types of neurotransmitters</li> <li>- Types of neurotransmitter receptors</li> <li>- Structure of the nervous system About Transcript</li> <li>- Functions of the nervous system</li> <li>- Motor unit</li> <li>- Peripheral somatosensation</li> <li>- Muscle stretch reflex</li> <li>- Autonomic nervous system</li> <li>- Upper motor neurons</li> <li>- Somatosensory tracts</li> <li>- Cerebral cortex</li> </ul>                                                                                                                                       |                                                                                                                                                                          |                                                   |                                                   |     |
| 8  | Muscular      | <ul style="list-style-type: none"> <li>- Myosin and actin</li> <li>- How tropomyosin and troponin regulate muscle contraction</li> <li>- Role of the sarcoplasmic reticulum in muscle cells</li> <li>- Anatomy of a skeletal muscle cell</li> <li>- Three types of muscle</li> <li>- Motor neurons</li> <li>- Neuromuscular junction, motor end-plate</li> <li>- Type 1 and type 2 muscle fibers</li> <li>- Calcium puts myosin to work</li> <li>- Muscle innervation</li> <li>- Autonomic vs somatic nervous system</li> <li>- Thermoregulation by muscles</li> </ul>                                | <ul style="list-style-type: none"> <li>- The Muscular System</li> <li>- Muscle Tissue</li> </ul>                                                                         | 18 <sup>a</sup> ,20 <sup>b</sup> ,19 <sup>c</sup> | 69 <sup>a</sup> ,55 <sup>b</sup> ,49 <sup>c</sup> | 1   |
| 9  | Skeletal      | <ul style="list-style-type: none"> <li>- Skeletal structure and function</li> <li>- Microscopic structure of bone - the Haversian system</li> <li>- Cellular structure of bone</li> <li>- Skeletal endocrine control</li> <li>- Cartilage</li> <li>- Ligaments, tendons, and joints</li> </ul>                                                                                                                                                                                                                                                                                                        | <ul style="list-style-type: none"> <li>- Bone Tissue and the Skeletal System</li> <li>- Joints</li> <li>- The Appendicular Skeleton</li> <li>- Axial Skeleton</li> </ul> | 10 <sup>a+b+c</sup>                               | 43 <sup>a+b+c</sup>                               | 0.5 |
| 10 | Endocrine     | <ul style="list-style-type: none"> <li>- Endocrine gland hormone review</li> <li>- The hypothalamus and pituitary gland</li> <li>- Hormone concentration metabolism and negative feedback</li> <li>- Types of hormones</li> <li>- Cellular mechanism of hormone action</li> </ul>                                                                                                                                                                                                                                                                                                                     | <ul style="list-style-type: none"> <li>- The Endocrine System</li> </ul>                                                                                                 | 10 <sup>a</sup> ,10 <sup>b+c</sup>                | 47 <sup>a</sup> ,55 <sup>b+c</sup>                | 0.5 |
| 11 | Integumentary | <ul style="list-style-type: none"> <li>- Meet the skin!</li> <li>- What is skin?</li> <li>- What lies beneath the epidermis? (Dermis and Hypodermis)</li> <li>- Where do our nails and hair come from?</li> <li>- What's in sweat? (Holocrine, Apocrine, Merocrine Glands)</li> <li>- LeBron Asks: Why does sweating cool you down?</li> <li>- Overview of Sensation and Meissner's Corpuscle</li> <li>- Pacinian's Corpuscle and Merkel's Disk</li> <li>- Ruffini's Ending and Hair Follicle Receptor</li> <li>- Pain and temperature</li> <li>- Thermoregulation by muscles</li> </ul>              | <ul style="list-style-type: none"> <li>- The Integumentary System</li> <li>- The Tissue Level of Organization</li> <li>- The Cellular Level of Organization</li> </ul>   | 10 <sup>a+b+c</sup>                               | 36 <sup>a+b+c</sup>                               | 1   |
| 12 | Lymphatic     | <ul style="list-style-type: none"> <li>- Why we need a lymphatic system</li> <li>- How lymphatic vessels move fluid</li> <li>- The lymphatic system's role in immunity</li> <li>- Lipid and protein transport in the lymphatic system</li> <li>- What is actually in lymph</li> </ul>                                                                                                                                                                                                                                                                                                                 | <ul style="list-style-type: none"> <li>- The Lymphatic and Immune System</li> </ul>                                                                                      | 10 <sup>a+b+c</sup>                               | 57 <sup>a+b+c</sup>                               | 1   |
| 13 | Reproductive  | <ul style="list-style-type: none"> <li>- Welcome to the reproductive system</li> <li>- Anatomy of the male reproductive system</li> <li>- Transport of sperm via erection and ejaculation</li> <li>- Spermatogenesis</li> <li>- Testosterone</li> <li>- Basics of egg development</li> <li>- The ovarian cycle</li> <li>- Meet the placenta!</li> <li>- Reproductive cycle graph - Follicular phase</li> <li>- Reproductive cycle graph - Luteal phase</li> <li>- Estrogen</li> <li>- Maternal changes in pregnancy</li> <li>- Labor (parturition)</li> <li>- Breast anatomy and lactation</li> </ul> | <ul style="list-style-type: none"> <li>- The Reproductive System</li> <li>- Development and Inheritance</li> </ul>                                                       | 10 <sup>a</sup> ,10 <sup>b</sup>                  | 40 <sup>a</sup> ,39 <sup>b</sup>                  | 1   |

<sup>a</sup> Difficulty level easy

<sup>b</sup> Difficulty level medium

<sup>c</sup> Difficulty level hard

+ Combination of levels
