# Supplementary material for: Basic Medical Training for Refugees via Collaborative Blended Learning: Quasi-Experimental Design
Source: PubMed Central journal article supplement (PMC8074855; doi:10.2196/22345), 2021-03-24
Supplement: jmir_v23i3e22345_app3.pdf [file jmir_v23i3e22345_app3.pdf]

**Multimedia Appendix 3.** The complete characteristics of the intervention and control group participants.

| Students [ID]    | Written score [%] | Oral score [%]  | Origins     | Sexe   | Prior knowledge | Absolute frequency                                                                                           |
|------------------|-------------------|-----------------|-------------|--------|-----------------|--------------------------------------------------------------------------------------------------------------|
| K1 <sup>a</sup>  | 75 (56/75)        | 100 (20/20)     | South Sudan | Male   | Yes             | Origins: 2 <sup>d</sup> , 1 <sup>e</sup> , 3 <sup>f</sup> , 1 <sup>e</sup> , 3 <sup>h</sup> , 1 <sup>i</sup> |
| K2 <sup>a</sup>  | 54 (41/75)        | 75 (15/20)      | South Sudan | Male   | No              | Sexe: 3 <sup>j</sup> , 8 <sup>k</sup>                                                                        |
| K3 <sup>a</sup>  | 71 (53/75)        | 95 (19/20)      | South Sudan | Male   | No              | Prior knowledge: 4 <sup>l</sup> , 7 <sup>m</sup>                                                             |
| K4 <sup>a</sup>  | 42 (32/75)        | 70 (14/20)      | Somalia     | Male   | No              |                                                                                                              |
| K5 <sup>a</sup>  | 45 (34/75)        | 80 (16/20)      | Sudan       | Male   | No              |                                                                                                              |
| K6 <sup>a</sup>  | 36 (27/75)        | 70 (14/20)      | Ethiopia    | Female | Yes             |                                                                                                              |
| K7 <sup>a</sup>  | 52 (39/75)        | 45 (9/20)       | Burundi     | Female | Yes             |                                                                                                              |
| K8 <sup>a</sup>  | 17 (13/75)        | 10 (2/20)       | RDC         | Female | No              |                                                                                                              |
| K9 <sup>a</sup>  | 80 (60/75)        | 95 (19/20)      | Burundi     | Male   | Yes             |                                                                                                              |
| K10 <sup>a</sup> | 46 (35/75)        | 40 (8/20)       | RDC         | Male   | No              |                                                                                                              |
| K11 <sup>a</sup> | 39 (29/75)        | 60 (12/20)      | RDC         | Male   | No              |                                                                                                              |
| D1 <sup>b</sup>  | 39 <sup>c</sup>   | 77 <sup>c</sup> | NA          | NA     | NA              | Origins: 1 <sup>f</sup> , 17 <sup>g</sup>                                                                    |
| D2 <sup>b</sup>  | 38 <sup>c</sup>   | 42 <sup>c</sup> | NA          | NA     | NA              | Sexe: 5 <sup>j</sup> , 13 <sup>k</sup>                                                                       |
| D3 <sup>b</sup>  | 48 <sup>c</sup>   | 38 <sup>c</sup> | NA          | NA     | NA              | Prior knowledge: 7 <sup>l</sup> , 11 <sup>m</sup>                                                            |
| D4 <sup>b</sup>  | 29 <sup>c</sup>   | 45 <sup>c</sup> | NA          | NA     | NA              |                                                                                                              |
| D5 <sup>b</sup>  | 28 <sup>c</sup>   | 52 <sup>c</sup> | NA          | NA     | NA              |                                                                                                              |
| D6 <sup>b</sup>  | 38 <sup>c</sup>   | 52 <sup>c</sup> | NA          | NA     | NA              |                                                                                                              |
| D7 <sup>b</sup>  | 28 <sup>c</sup>   | 47 <sup>c</sup> | NA          | NA     | NA              |                                                                                                              |
| D8 <sup>b</sup>  | 37 <sup>c</sup>   | 38 <sup>c</sup> | NA          | NA     | NA              |                                                                                                              |
| D9 <sup>b</sup>  | 22 <sup>c</sup>   | 62 <sup>c</sup> | NA          | NA     | NA              |                                                                                                              |
| D10 <sup>b</sup> | 0 <sup>c</sup>    | 30 <sup>c</sup> | NA          | NA     | NA              |                                                                                                              |
| D11 <sup>b</sup> | 8 <sup>c</sup>    | 39 <sup>c</sup> | NA          | NA     | NA              |                                                                                                              |
| D12 <sup>b</sup> | 56 <sup>c</sup>   | 79 <sup>c</sup> | NA          | NA     | NA              |                                                                                                              |
| D13 <sup>b</sup> | 41 <sup>c</sup>   | 50 <sup>c</sup> | NA          | NA     | NA              |                                                                                                              |
| D14 <sup>b</sup> | 7 <sup>c</sup>    | 43 <sup>c</sup> | NA          | NA     | NA              |                                                                                                              |
| D15 <sup>b</sup> | 21 <sup>c</sup>   | 42 <sup>c</sup> | NA          | NA     | NA              |                                                                                                              |
| D16 <sup>b</sup> | 27 <sup>c</sup>   | 53 <sup>c</sup> | NA          | NA     | NA              |                                                                                                              |
| D17 <sup>b</sup> | 48 <sup>c</sup>   | 93 <sup>c</sup> | NA          | NA     | NA              |                                                                                                              |
| D18 <sup>b</sup> | 32 <sup>c</sup>   | 40 <sup>c</sup> | NA          | NA     | NA              |                                                                                                              |

**Results**

Written score

51<sup>n</sup> (18.7)<sup>o</sup>; 46<sup>p</sup> (11.9)<sup>q</sup>; 17<sup>r</sup>-80<sup>s</sup> (63)<sup>t</sup>; 0.1<sup>u</sup>, 1.1<sup>v</sup>, 5.6<sup>w</sup> (a)  
 30<sup>n</sup> (14.9)<sup>o</sup>; 31<sup>p</sup> (12.6)<sup>q</sup>; 0<sup>r</sup>-56<sup>s</sup> (56)<sup>t</sup>; -0.4<sup>u</sup>, -0.7<sup>v</sup>, 3.5<sup>w</sup> (b)

*By categories*

Male 57<sup>n</sup> (16.3)<sup>o</sup>; 50<sup>p</sup> (14.1)<sup>q</sup>; 39<sup>r</sup>-80<sup>s</sup> (41)<sup>t</sup>; 0.3<sup>u</sup>, -1.9<sup>v</sup>, 5.8<sup>w</sup> (a)  
 NA (b)  
 Female 35<sup>n</sup> (17.5)<sup>o</sup>; 36<sup>p</sup> (23.7)<sup>q</sup>; 17<sup>r</sup>-52<sup>s</sup> (35)<sup>t</sup>; -0.06<sup>u</sup>, -2.33<sup>v</sup>, 10.12<sup>w</sup> (a)  
 NA (b)  
 Prior knowledge:Yes 61<sup>n</sup> (20.5)<sup>o</sup>; 64<sup>p</sup> (20.8)<sup>q</sup>; 36<sup>r</sup>-80<sup>s</sup> (44)<sup>t</sup>; -0.2<sup>u</sup>, -2.2<sup>v</sup>, 10.7<sup>w</sup> (a)  
 NA (b)  
 Prior knowledge:No 45<sup>n</sup> (16.3)<sup>o</sup>; 45<sup>p</sup> (8.9)<sup>q</sup>; 17<sup>r</sup>-71<sup>s</sup> (54)<sup>t</sup>; -0.1<sup>u</sup>, -0.8<sup>v</sup>, 6.2<sup>w</sup> (a)  
 NA (b)

Oral score

67<sup>n</sup> (27.2)<sup>o</sup>; 70<sup>p</sup> (37)<sup>q</sup>; 10<sup>r</sup>-100<sup>s</sup> (90)<sup>t</sup>; -0.6<sup>u</sup>, -0.7<sup>v</sup>, 8.2<sup>w</sup> (a)  
 51<sup>n</sup> (16.6)<sup>o</sup>; 46<sup>p</sup> (9.6)<sup>q</sup>; 30<sup>r</sup>-93<sup>s</sup> (63)<sup>t</sup>; 1.1<sup>u</sup>, 0.3<sup>v</sup>, 3.9<sup>w</sup> (b)

*By categories*

Male 77<sup>n</sup> (20.3)<sup>o</sup>; 78<sup>p</sup> (26)<sup>q</sup>; 40<sup>r</sup>-100<sup>s</sup> (60)<sup>t</sup>; -0.5<sup>u</sup>, -1.2<sup>v</sup>, 7.2<sup>w</sup> (a)  
 NA (b)  
 Female 42<sup>n</sup> (30.1)<sup>o</sup>; 45<sup>p</sup> (37.1)<sup>q</sup>; 10<sup>r</sup>-70<sup>s</sup> (60)<sup>t</sup>; -0.1<sup>u</sup>, -2.3<sup>v</sup>, 17.4<sup>w</sup> (a)  
 NA (b)  
 Prior knowledge:Yes 78<sup>n</sup> (25.3)<sup>o</sup>; 83<sup>p</sup> (22.2)<sup>q</sup>; 45<sup>r</sup>-100<sup>s</sup> (55)<sup>t</sup>; -0.3<sup>u</sup>, -2.1<sup>v</sup>, 12.7<sup>w</sup> (a)  
 NA (b)  
 Prior knowledge:No 61<sup>n</sup> (28.4)<sup>o</sup>; 70<sup>p</sup> (14.8)<sup>q</sup>; 10<sup>r</sup>-95<sup>s</sup> (85)<sup>t</sup>; -0.6<sup>u</sup>, -1.1<sup>v</sup>, 10.7<sup>w</sup> (a)  
 NA (b)

<sup>a</sup> Intervention Group

<sup>m</sup> No

<sup>b</sup> Control Group

<sup>n</sup> Mean

<sup>c</sup> Absolute number not provided by teachers

<sup>o</sup> Standard deviation

<sup>d</sup> Burundi

<sup>p</sup> Median

<sup>e</sup> Ethiopia

<sup>q</sup> Median absolute deviation

<sup>f</sup> Republic democratic congo

<sup>r</sup> Minimum

<sup>g</sup> Somalia

<sup>s</sup> maximum

<sup>h</sup> South Sudan

<sup>t</sup> Range

<sup>i</sup> Sudan

<sup>u</sup> Skew

<sup>j</sup> Female

<sup>v</sup> Kurtosis

<sup>k</sup> Male

<sup>w</sup> Standard error

<sup>l</sup> Yes
