# Supplementary material for: Basic Medical Training for Refugees via Collaborative Blended Learning: Quasi-Experimental Design
Source: PubMed Central journal article supplement (PMC8074855; doi:10.2196/22345), 2021-03-24
Supplement: jmir_v23i3e22345_app4.pdf [file jmir_v23i3e22345_app4.pdf]

#### Multimedia Appendix 4.

Analysis was performed with the WhatsAnalyzer program provided by the University of Würzburg.

**Figure 1.** General statistics for WhatsApp Group.

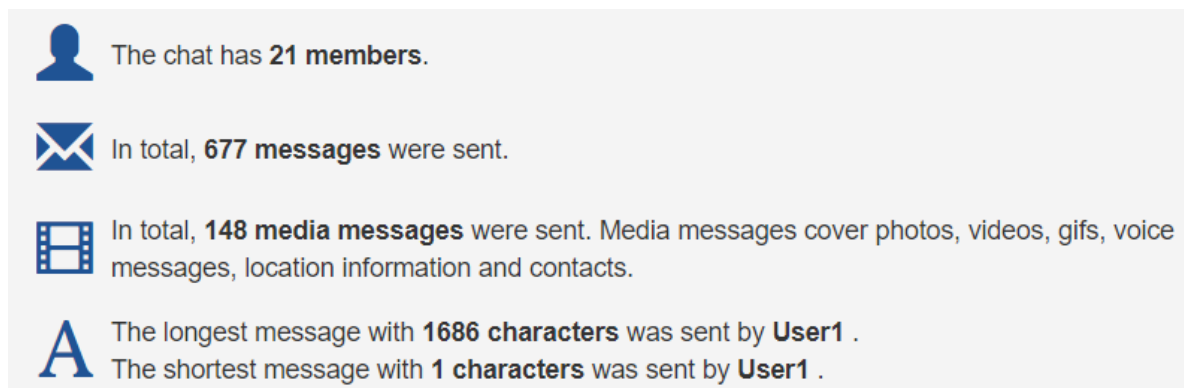

**Figure 2.** Messages sent per user on WhatsApp chat.

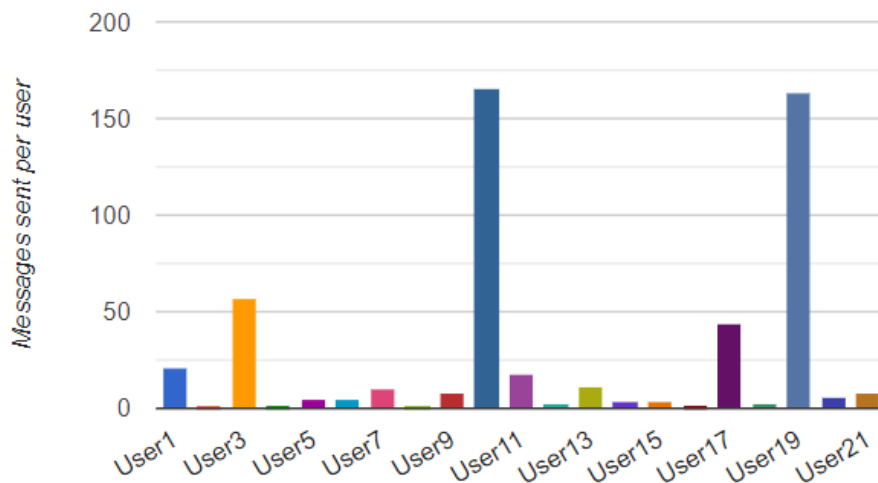

**Figure 3.** Messages sent on average during Module 1 on the WhatsApp platform.

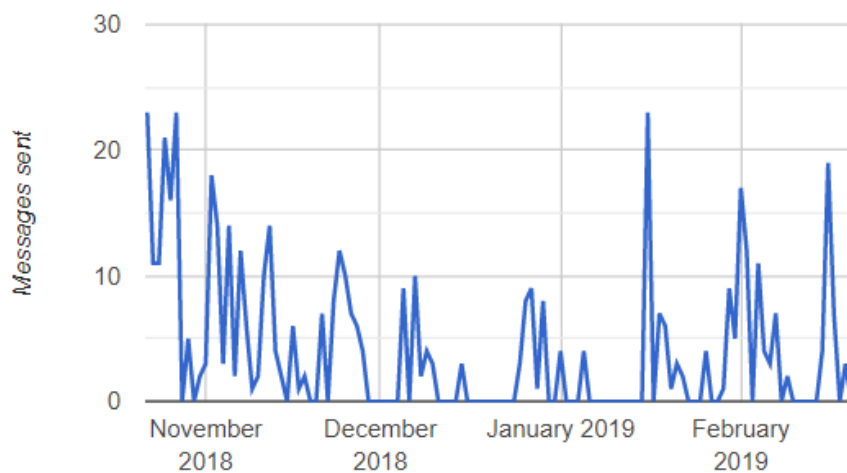

**Figure 4.** Messages sent on average by days during Module 1 on the WhatsApp platform.

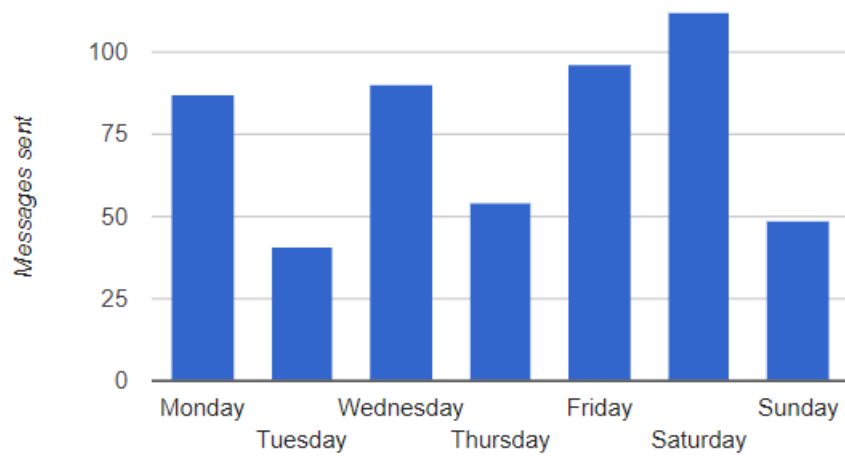

**Figure 5.** Messages sent on average by hours during Module 1 on the WhatsApp platform.

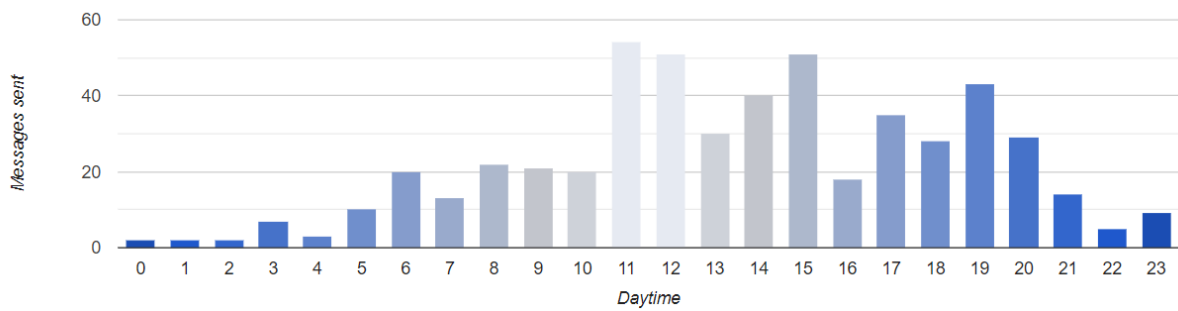

**Figure 6.** Communication network between users during Module 1.

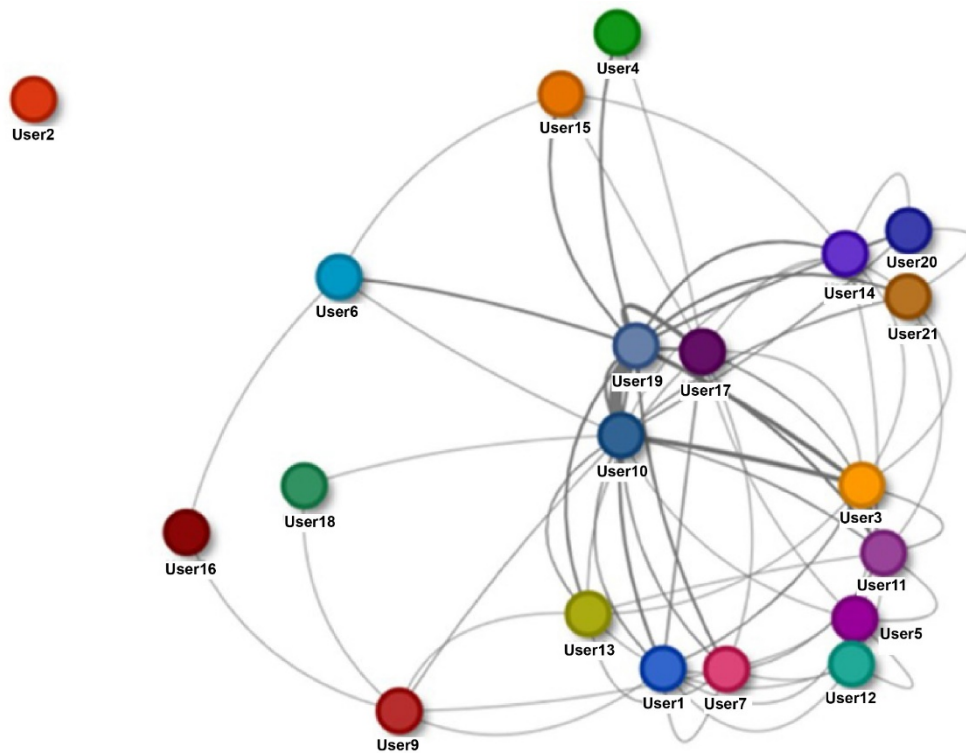

*Teachers are User 19 & 21.*
