# Supplementary material for: Basic Medical Training for Refugees via Collaborative Blended Learning: Quasi-Experimental Design
Source: PubMed Central journal article supplement (PMC8074855; doi:10.2196/22345), 2021-03-24
Supplement: jmir_v23i3e22345_app5.pdf [file jmir_v23i3e22345_app5.pdf]

**Figure 2.** Barplot representation of the total sentiment score in the WhatsApp group.

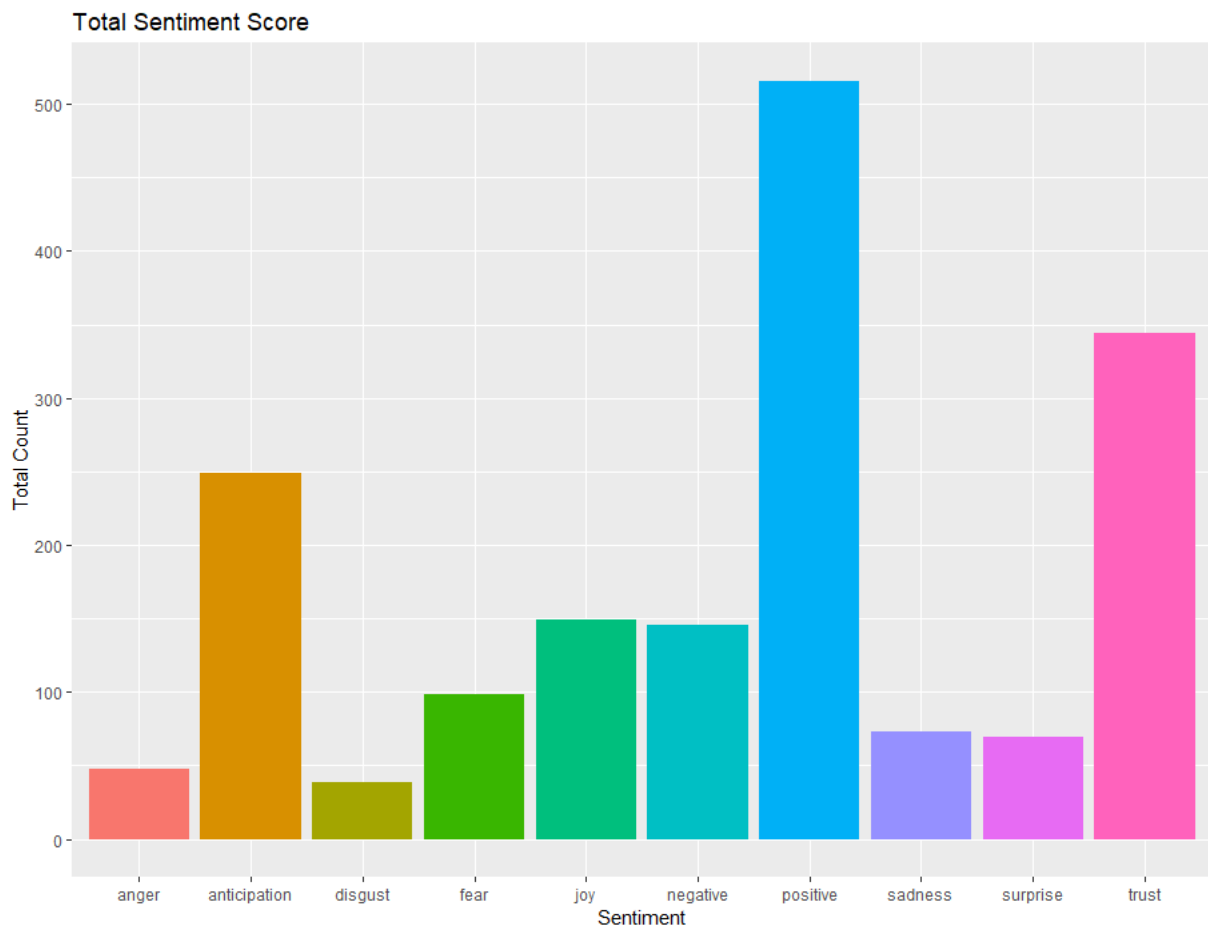

Text mining graphical representation of sentiment analysis on 10 different sentiments. They are represented on the x-axis and on the y-axis the absolute frequency of each sentiment. The graph shows that the most representative sentiment was positive (n=516), followed by trust (n=344) and the least representative was disgust (n=39).
